# Supplementary material for: Tuwongella immobilis gen. nov., sp. nov., a novel non-motile bacterium within the phylum Planctomycetes
Source: PubMed Central journal article supplement (PMC5845749; doi:10.1099/ijsem.0.002271), 2017-10-31
Supplement: ijsem-67-4923-s001.pdf [file ijsem-67-4923-s001.pdf]

## SUPPLEMENTARY DATA

**Journal:** International Journal of Systematic and Evolutionary Microbiology

**Title:** *Tuwongella immobilis* gen. nov., sp. nov., a novel non-motile bacterium within the phylum *Planctomycetes*

**Authors:** Christian Seeger<sup>1</sup>, Margaret K. Butler<sup>2</sup>, Benjamin Yee<sup>1</sup>, Mayank Mahajan<sup>1</sup>, John A. Fuerst<sup>3</sup> and Siv G.E. Andersson<sup>1,\*</sup>

**Affiliations:** <sup>1</sup>Department of Cell and Molecular Biology, *Molecular Evolution*, Uppsala University, Box 596, 751 24 Uppsala, Sweden

<sup>2</sup>Australian Center for Ecogenomics, School of Chemistry and Molecular Biosciences, University of Queensland, Brisbane, Queensland 4072, Australia

<sup>3</sup>School of Chemistry and Molecular Biosciences, University of Queensland, Brisbane, Queensland 4072, Australia

**Corresponding author:** \*Email: [siv.andersson@icm.uu.se](mailto:siv.andersson@icm.uu.se); Phone: +46 (0)18-471 4379

## Supplementary Figures

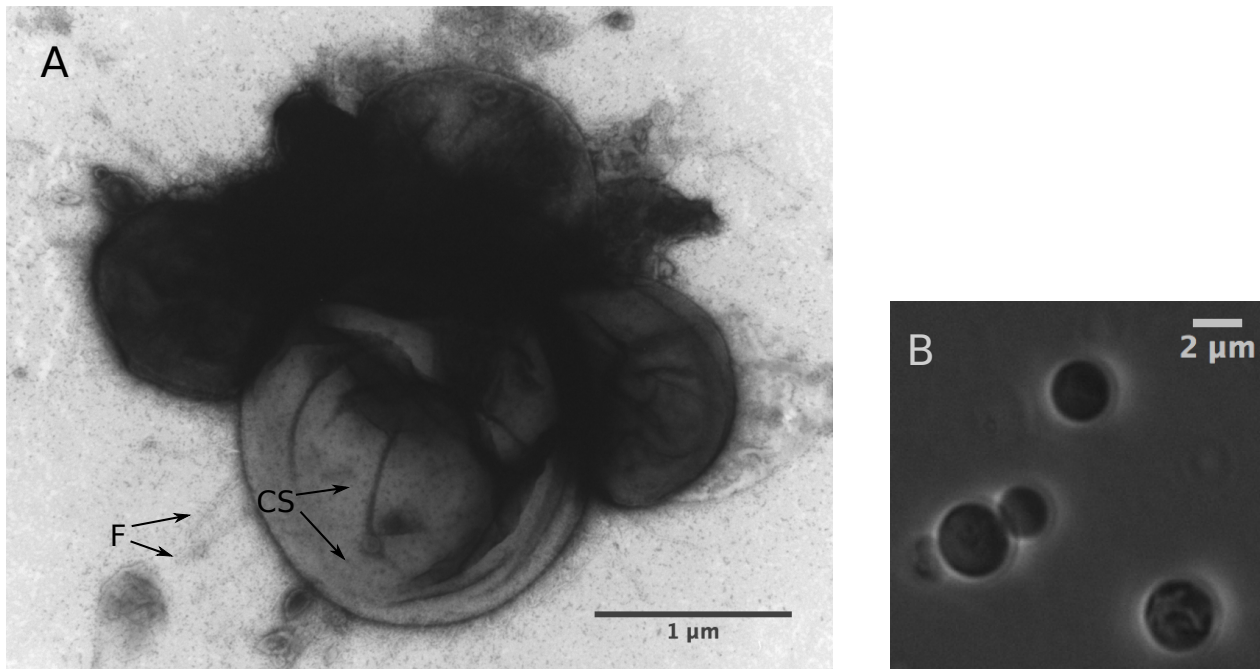

**Supplementary Fig. 1.** A) Transmission electron micrograph of negatively stained MBLW1<sup>T</sup> shows crateriform structures (CS) distributed over the cell surface and fimbriae (F). B) Phase contrast micrograph of MBLW1<sup>T</sup> shows absence of stalks and rosettes.

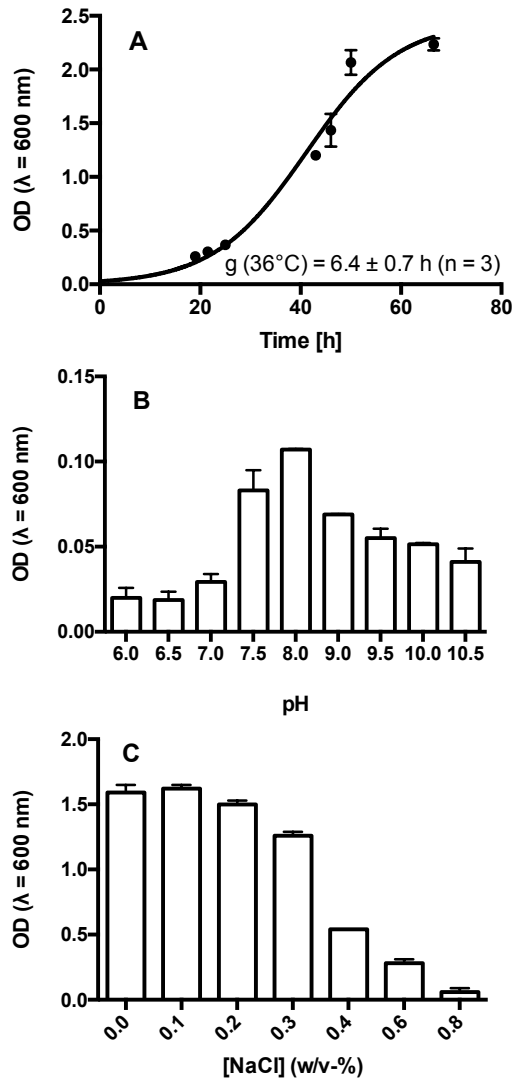

**Supplementary Fig. 2.** Biochemical and physiological characterization of MBLW1<sup>T</sup>. **A)** Growth of MBLW1<sup>T</sup> in M1 medium at 36°C was measured by the increase in optical density (OD) at  $\lambda = 600$  nm over time. The generation time of 6.5 h was determined by fitting a logistic growth model to the experimental data using GraphPad Prism 6. **B)** Growth measured as optical density at  $\lambda = 600$  nm of MBLW1<sup>T</sup> in M1 medium at different pH values after cultivation for 2 days at 32°C. **C)** Growth measured as optical density at  $\lambda = 600$  nm of MBLW1<sup>T</sup> as a function of NaCl concentration (w/v-%) after cultivation in M1 medium for 5 days at 30°C.

## Supplementary Table

**Supplementary Table 1.** Fatty acid profile of MBLW1<sup>T</sup> and *G. obscuriglobus* based on FAME analysis. Values are percentages of total sum of fatty acids. n.d., not detected.

| Fatty acid   | MBLW1 <sup>T</sup> | <i>G. obscuriglobus</i> |
|--------------|--------------------|-------------------------|
| 13:0 ISO 3OH | 0.1                | n.d.                    |
| 14:0         | 0.9                | n.d.                    |
| 15:0         | 0.7                | n.d.                    |
| 15:0 ISO     | n.d.               | 0.9                     |
| 15:0 ISO 3OH | n.d.               | n.d.                    |
| 15:0 ANTEISO | n.d.               | 7.9                     |
| 16:0         | 25.0               | 3.6                     |
| 16:0 ISO     | n.d.               | 1.4                     |
| 16:0 3OH     | 2.3                | n.d.                    |
| 16:0 ISO 3OH | n.d.               | n.d.                    |
| 16:1 ω5c     | 59.0               | 27.5                    |
| 17:0         | 2.2                | 0.3                     |
| 17:0 ISO     | 0.5                | n.d.                    |
| 17:0 ANTEISO | n.d.               | 4.6                     |
| 18:0         | 6.7                | 49.2                    |
| 18:1 ω5c     | 2.5                | 2.5                     |
| 18:1 ω7c     | n.d.               | 1.6                     |
